# Supplementary material for: The hydrothermal synthesis of ultra-high aspect ratio Ag nanoflakes and their performance as conductive fillers in heaters and pastes
Source: Royal Society of Chemistry journal article supplement (doi:10.1039/c7ra11937b), 2018-01-01
Supplement: c7ra11937b1.pdf [file c7ra11937b1.pdf]

## Electronic Supporting Information

### Hydrothermal Synthesis of Ultra-high Aspect Ratio Ag Nanoflakes and Performance as conductive fillers in Film Heater and paste

H. Wang, W. J. Yang, K. B. Li and G. H. Li\*

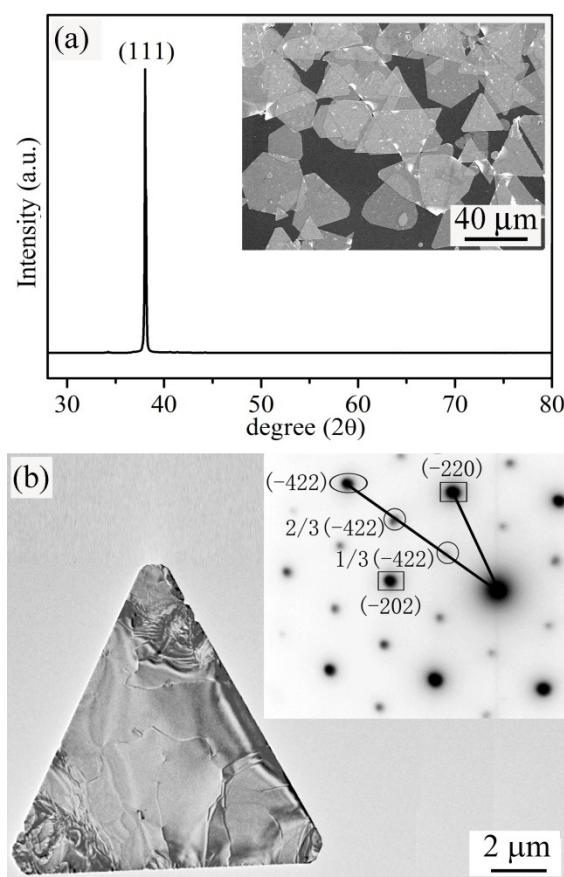

**Fig. S1.** (a) XRD pattern and FESEM image of Ag nanoflakes, (b) a typical TEM image of a triangle Ag nanoflakes and the corresponding SAED pattern.

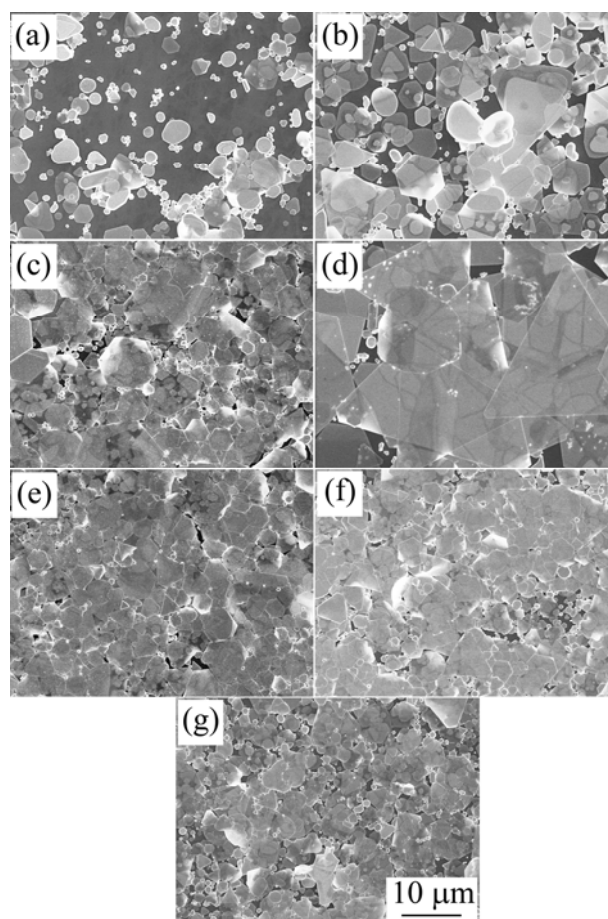

**Fig. S2.** FESEM images of Ag nanoflakes with PVP-K60 concentration of (a) 0.09, (b) 0.18, (c) 0.27, (d) 0.36, (e) 0.45, (f) 0.54 and (g) 0.63 M.

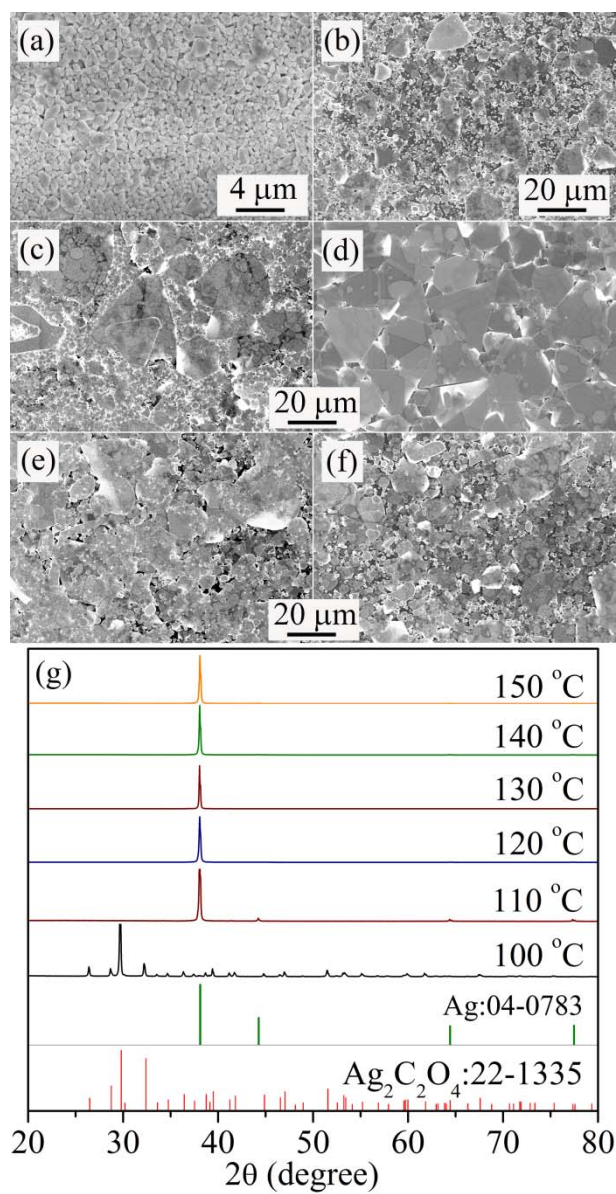

**Fig. S3.** FESEM images of Ag nanoflakes at reaction temperature of (a) 100, (b) 110, (c) 120, (d) 130, (e) 140, and (f) 150 °C. (g) The corresponding XRD spectra of the products at different temperatures.

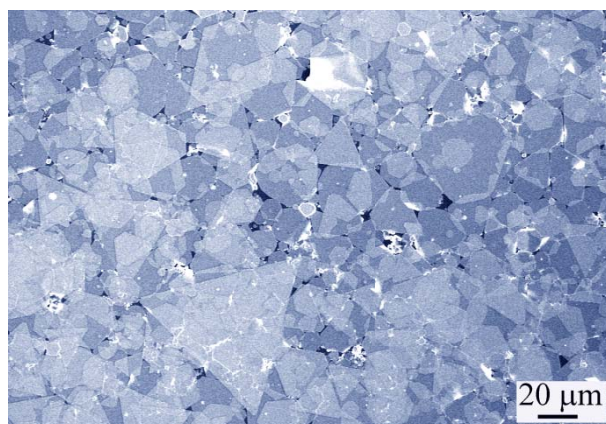

**Fig. S4.** FESEM image of Ag nanoflakes with a total output of about 1.5 g.

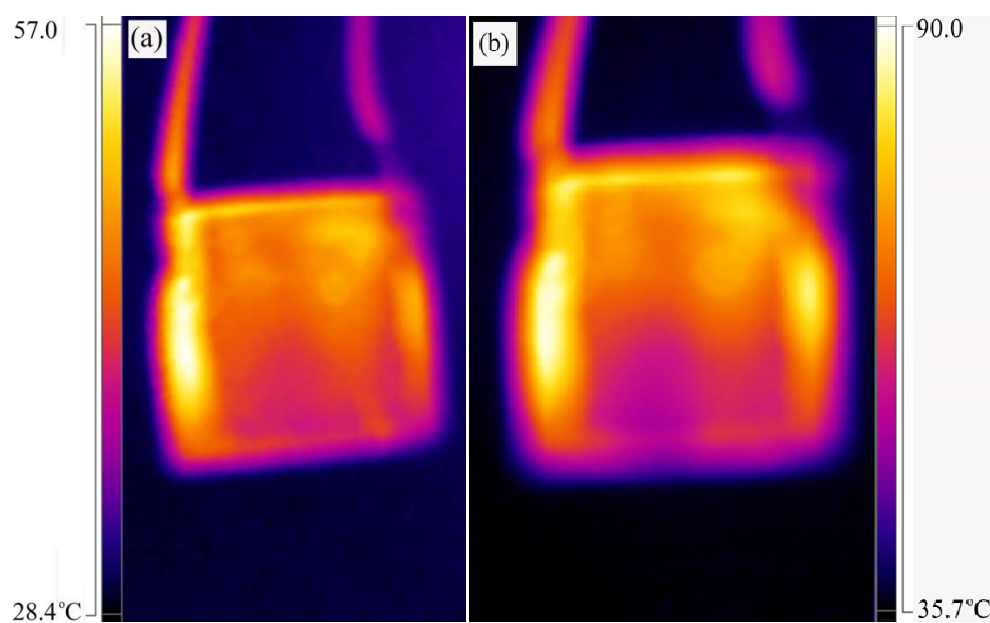

**Fig. S5.** Infrared photographs of Ag nanoflakes film heater at constant input voltage of (a) 0.5 and (b) 0.8 V with the surface temperature of 43.1 and 62.8 °C, respectively.

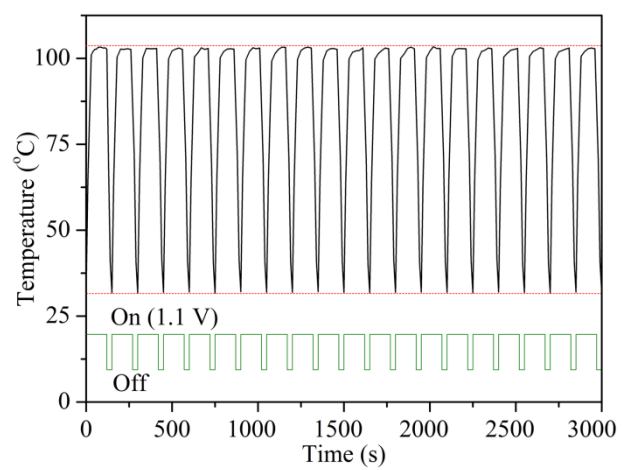

**Fig. S6.** Temperature profile of Ag nanoflakes heater within 20 cycles at an applied voltage of 1.1 V.
